# Supplementary material for: Bacterial and archaeal spatial distribution and its environmental drivers in an extremely haloalkaline soil at the landscape scale
Source: PubMed Central journal article supplement (PMC6587938; doi:10.7717/peerj.6127), 2019-06-18

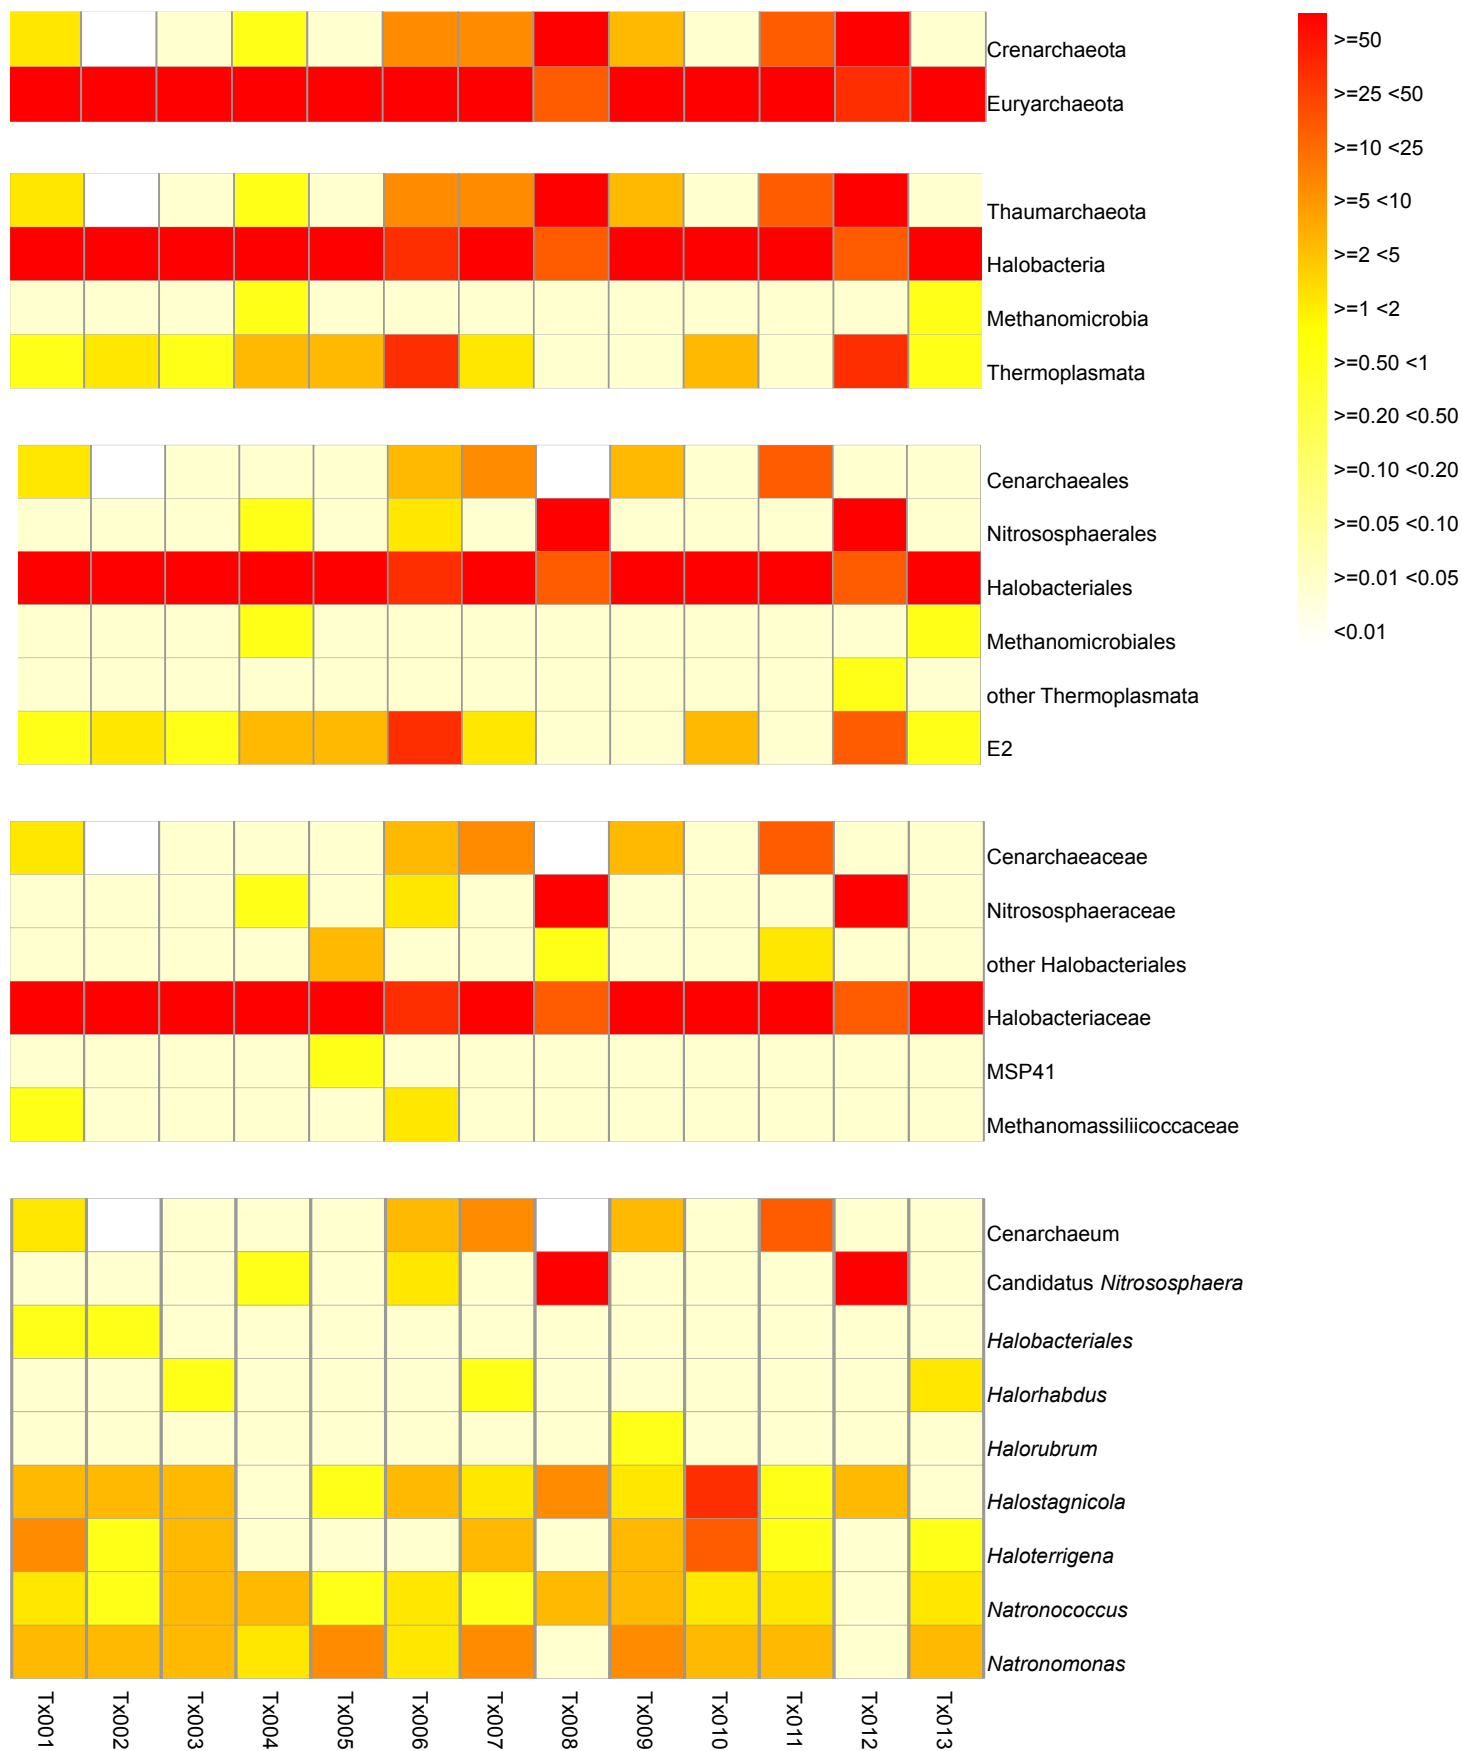

Supplement: peerj-07-6127-s001.pdf [file peerj-07-6127-s001.pdf]
